# Supplementary material
Source: PubMed Central journal article supplement (PMC3809378)
Supplement: Supp_Fig1.pdf [file Supp_Fig1.pdf]

## Supplementary Data

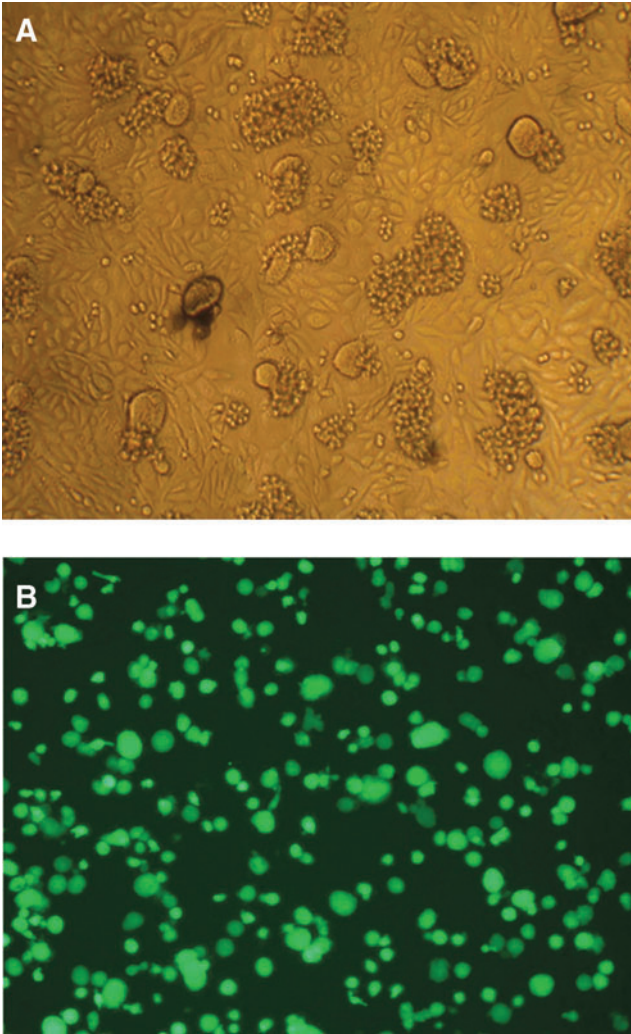

**SUPPLEMENTARY FIG. S1.** The representative images of syncytia and fluorescent dye-transfer resulting from HIV-1-mediated cell-cell fusion. **(A)** Cell-cell fusion between CHO-WT cells and MT-2 cells; **(B)** cell-cell fusion between calcein-labeled HIV-1<sub>III<sub>B</sub></sub>-infected H9 cells (H9/HIV-1<sub>III<sub>B</sub></sub>) and MT-2 cells.
