# Supplementary material
Source: PubMed Central journal article supplement (PMC3809378)
Supplement: Supp_Fig2.pdf [file Supp_Fig2.pdf]

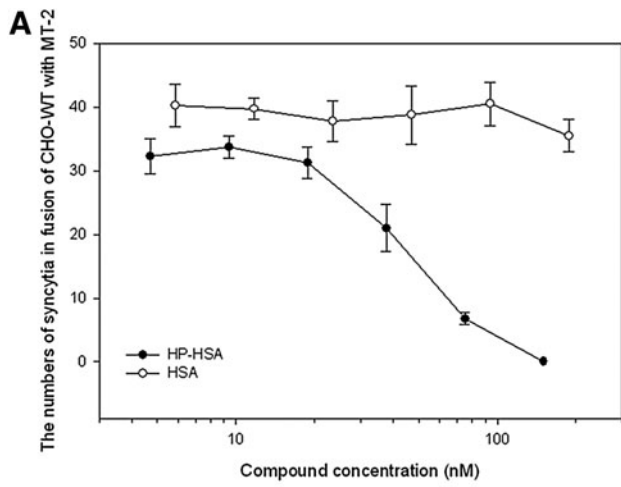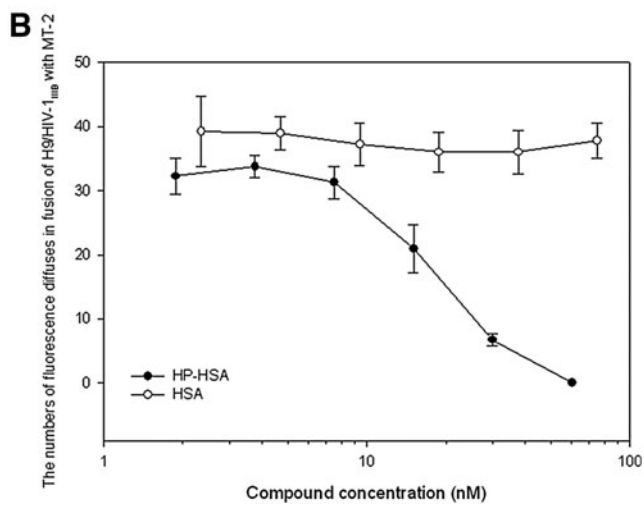

**SUPPLEMENTARY FIG. S2.** Numbers of the formation of syncytia or the fused cells labeled with fluorescence in HIV-1-mediated cell-cell fusion. **(A)** Cell-cell fusion between CHO-WT cells and MT-2 cells; **(B)** cell-cell fusion between calcein-labeled HIV-1<sub>IIIb</sub>-infected H9 cells (H9/HIV-1<sub>IIIb</sub>) and MT-2 cells. Data are presented as means  $\pm$  SD.
