# Supplementary material
Source: PubMed Central journal article supplement (PMC3809378)
Supplement: Supp_Fig3.pdf [file Supp_Fig3.pdf]

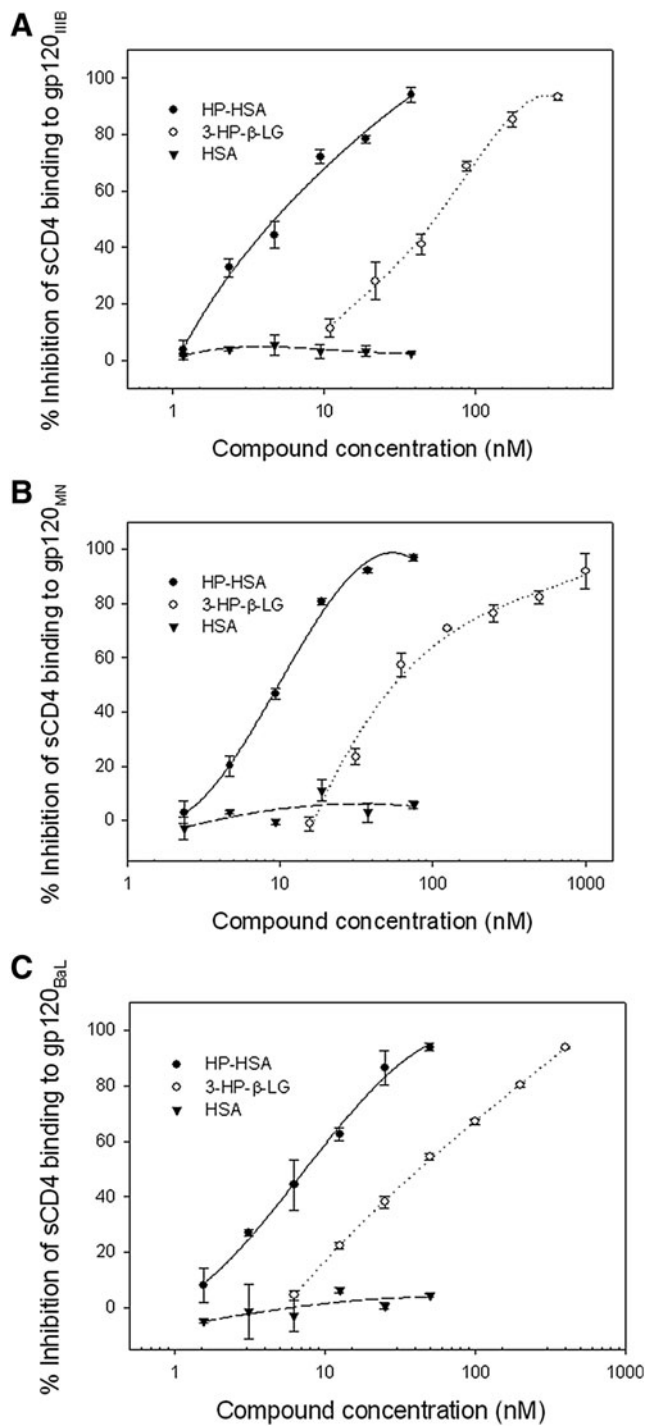

**SUPPLEMENTARY FIG. S3.** Inhibition of sCD4 binding to different HIV-1 gp120. (A) gp120 from HIV-1<sub>IIIIB</sub>; (B) gp120 from HIV-1<sub>MN</sub>; (C) gp120 from HIV-1<sub>BaL</sub>. Data are presented as means ± SD.
