# Supplementary material
Source: PubMed Central journal article supplement (PMC3809378)
Supplement: Supp_Fig4.pdf [file Supp_Fig4.pdf]

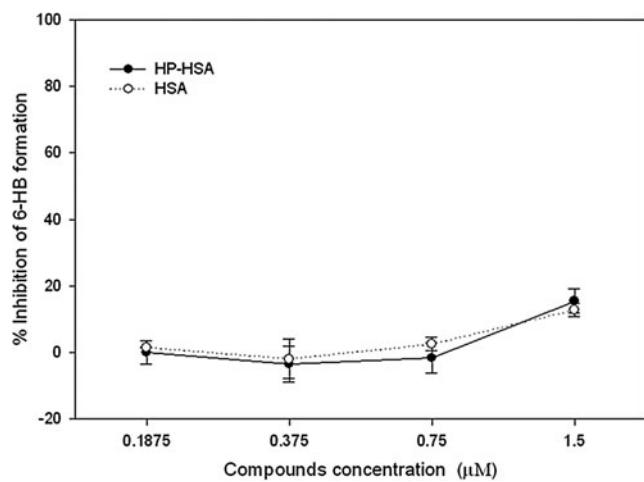

**SUPPLEMENTARY FIG. S4.** Inhibition of gp41 six-helix bundle formation by HP-HSA. Data are presented as means  $\pm$  SD.
